# Supplementary material for: Regulation of positive and negative selection and TCR signaling during thymic T cell development by capicua
Source: eLife journal article supplement (doi:10.7554/elife.71769), 2021-12-13
Supplement: supp [file elife-71769-supp-v1.zip]

Archive with 22 entries (22 files):
- elife_poa_e71769_Transparent_Reporting_File.docx
- elife_poa_e71769_Figure_1_source_data_1.xlsx
- elife_poa_e71769_Figure_2_source_data_1.zip
- elife_poa_e71769_Figure_3_source_data_1.xlsx
- elife_poa_e71769_Figure_4_source_data_1.xlsx
- elife_poa_e71769_Figure_5_source_data_1.xlsx
- elife_poa_e71769_Figure_5_source_data_2.zip
- elife_poa_e71769_Figure_6_source_data_1.xlsx
- elife_poa_e71769_Figure_7_source_data_1.xlsx
- elife_poa_e71769_Supplementary_file_1.docx
- elife_poa_e71769_Supplementary_file_2.docx
- elife_poa_e71769_Supplementary_file_3.docx
- elife_poa_e71769_Supplementary_file_4.pdf
- elife_poa_e71769_Figure_1_figure_supplement_1.ai
- elife_poa_e71769_Figure_1_figure_supplement_2.ai
- elife_poa_e71769_Figure_1_figure_supplement_3.ai
- elife_poa_e71769_Figure_3_figure_supplement_1.ai
- elife_poa_e71769_Figure_4_figure_supplement_1.ai
- elife_poa_e71769_Figure_4_figure_supplement_2.ai
- elife_poa_e71769_Figure_5_figure_supplement_1.ai
- elife_poa_e71769_Figure_6_figure_supplement_1.ai
- elife_poa_e71769_Figure_7_figure_supplement_1.ai
