# Supplementary material for: Regulation of positive and negative selection and TCR signaling during thymic T cell development by capicua
Source: eLife journal article supplement (doi:10.7554/elife.71769), 2021-12-13
Supplement: supp [file elife-71769-supp-v1.zip › elife_poa_e71769_Figure_1_source_data_1.xlsx]

## Sheet: 1A
	Figure 1A. CIC levels in thymic T cell subsets
		DN1	DN2	DN3	DN4	ISP	DP	SM 4SP	SM 8SP	M 4SP	M 8SP
	1					3794	1343	1068	1584	1748	2359
	2	3127	4200	3108	3129	4062	1481	1181	1876	1913	2683
	3	2726	4474	3267	3396	4781	1922	1524	2143	2175	2996
	4	3202	4020	3099	2912	3961	1669	1243	1891	2024	2864
	5	2688	3755	2656	2598
	6	3051	3927	2851	2762	4199	1679	1333	1940	2063	2799
	7	2758	3958	2856	2621	3985	1601	1306	1935	2137	2949
	8	3887	4854	3636	3176	4217	1510	1310	1834	1933	2678
	Anaylsis was done with total 8 independent samples obtained from independent animals.
	Each experiment was repeated three times (biological replication) and pooled for presentation.

## Sheet: 1B
	Figure 1B. Total numbers of thymocytes from 7-week-old Cicf/f, Cicf/f;Cd4-Cre, and Cicf/f;Vav1-Cre mice
		Cicf/f	Cicf/f;Cd4-cre	Cicf/f;Vav1-cre
	1	131	99	146
	2	240	141	101
	3	251	112	177
	4	174	170	175
	5	133	100	118
	6	126	88	142
	7	49	117	83
	8	94		169
	9	58		112
	10	107		159
	11	88		180
	12			117
	P value compared to Cicf/f		P value=0.8214	P value=0.9142
	P value between Cicf/f;Cd4-cre and Cicf/f;Vav1-cre			P value=0.6052
	Analysis was done with 11, 7, and 12 independent samples for each group, respectively.
	Each experiment was repeated three times (biological replication) and pooled for presentation.

## Sheet: 1C
	Figure 1C. Proportions of DN1-4 subsets from 7-week-old Cicf/f, Cicf/f;Cd4-Cre, and Cicf/f;Vav1-Cre mice
	DN1	Cicf/f	Cicf/f;Cd4-cre	Cicf/f;Vav1-cre		DN2	Cicf/f	Cicf/f;Cd4-cre	Cicf/f;Vav1-cre
	1	1.79	2.42	2.07		1	9.69	13.7	17.2
	2	2.04	4.01	0.98		2	14.2	11.2	15.7
	3	1.81	2.7	1.47		3	15.1	12.3	17.4
	4	1.63	3.44	2.02		4	15.5	12.2	18.5
	5	1.42	1.31	1.31		5	11.4	9.8	17.1
	6	1.17	1.3	0.8		6	9.18	9.17	11.9
	7	1.72	1.74	2.07		7	8.51	5.38	13
	8	0.97				8	6.39
	P value compared to Cicf/f		P value=0.0720	P value=0.9941		P value compared to Cicf/f		P value=0.8856	P value=0.0177
	P value between Cicf/f;Cd4-cre and Cicf/f;Vav1-cre			P value=0.0686		P value between Cicf/f;Cd4-cre and Cicf/f;Vav1-cre			P value=0.0081
	DN3	Cicf/f	Cicf/f;Cd4-cre	Cicf/f;Vav1-cre		DN4	Cicf/f	Cicf/f;Cd4-cre	Cicf/f;Vav1-cre
	1	65.9	66.8	70.5		1	22.6	17.1	10.2
	2	64.3	65.1	71.5		2	19.5	19.7	11.8
	3	64.4	70.2	68.6		3	18.7	14.8	12.5
	4	67.3	65.9	67.2		4	15.6	18.5	12.3
	5	64.4	68.8	65.3		5	22.8	20.1	16.3
	6	66.5	67	68.8		6	23.1	22.5	18.5
	7	62.2	65.5	67.7		7	27.6	27.4	17.3
	8	69.3				8	23.3
	P value compared to Cicf/f		P value=0.3514	P value=0.0290		P value compared to Cicf/f		P value=0.6664	P value=0.0022
	P value between Cicf/f;Cd4-cre and Cicf/f;Vav1-cre			P value=0.3897		P value between Cicf/f;Cd4-cre and Cicf/f;Vav1-cre			P value=0.0183
	Analysis was done with 8, 7, and 7 independent samples for each group, respectively.
	Each experiment was repeated three times (biological replication) and pooled for presentation.

## Sheet: 1D
	Figure 1D. Frequencies and numbers of DN, DP, CD4+ SP, and CD8+ SP cells from 7-week-old Cicf/f, Cicf/f;Cd4-Cre, and Cicf/f;Vav1-Cre mice
	DN %	Cicf/f	Cicf/f;Cd4-cre	Cicf/f;Vav1-cre		DN # (106 cells)	Cicf/f	Cicf/f;Cd4-cre	Cicf/f;Vav1-cre
	1	1.44	2.22	1.65		1	1.8864	2.1978	2.409
	2	1.72	1.41	1.99		2	4.128	1.9881	2.0099
	3	1.54	1.62	2.22		3	3.8654	1.8144	3.9294
	4	1.95	1.52	2.4		4	3.393	2.584	4.2
	5	1.3	1.35	1.6		5	1.6758	1.28	1.711
	6	1.13	1.46	1.32		6	1.386	1.2496	1.7182
	7	1.12	1.4	1.35		7	0.5292	1.5678	1.0375
	8	1.23		1.45		8	1.1186		2.0956
	9	1.24		1.9		9	0.6844		1.8816
	10	1.04		1.94		10	1.0058		2.7507
	11	1.38		1.19		11	1.1264		1.944
	12			1.68		12			1.7199
	P value compared to Cicf/f		P value=0.4327	P value=0.0383		P value compared to Cicf/f		P value=0.9857	P value=0.6265
	P value between Cicf/f;Cd4-cre and Cicf/f;Vav1-cre			P value=0.5782		P value between Cicf/f;Cd4-cre and Cicf/f;Vav1-cre			P value=0.5952
	DP %	Cicf/f	Cicf/f;Cd4-cre	Cicf/f;Vav1-cre		DP # (106 cells)	Cicf/f	Cicf/f;Cd4-cre	Cicf/f;Vav1-cre
	1	80.9	76.5	85.8		1	105.979	75.735	125.268
	2	81.7	82.6	84.7		2	196.08	116.466	85.547
	3	82.5	82.9	83.1		3	207.075	92.848	147.087
	4	80.1	85.1	84.7		4	139.374	144.67	148.225
	5	84.9	85.5	89.9		5	108.927	81.6	96.288
	6	87.3	84.7	89.8		6	106.47	72.336	116.724
	7	86.5	85.9	88.1		7	40.915	95.706	67.396
	8	86.9		88.3		8	78.772		127.088
	9	88.6		85.9		9	48.952		85.232
	10	85		87.3		10	81.855		123.861
	11	84.2		88.8		11	68.728		144.54
	12			87.1		12			89.505
	P value compared to Cicf/f		P value=0.6741	P value=0.0771		P value compared to Cicf/f		P value=0.8466	P value=0.9402
	P value between Cicf/f;Cd4-cre and Cicf/f;Vav1-cre			P value=0.0213		P value between Cicf/f;Cd4-cre and Cicf/f;Vav1-cre			P value=0.6730
	CD4 SP %	Cicf/f	Cicf/f;Cd4-cre	Cicf/f;Vav1-cre		CD4 SP # (106 cells)	Cicf/f	Cicf/f;Cd4-cre	Cicf/f;Vav1-cre
	1	10.5	12.2	7.51		1	13.755	12.078	10.9646
	2	9.16	9.04	7.78		2	21.984	12.7464	7.8578
	3	8.71	8.81	8.73		3	21.8621	9.8672	15.4521
	4	9.77	7.02	7.47		4	16.9998	11.934	13.0725
	5	8.23	7.14	4.52		5	10.5469	6.82	4.8262
	6	6.61	7.9	4.79		6	8.064	6.7408	6.2338
	7	7.05	7.13	6.12		7	3.332	7.9443	4.6812
	8	6.91		6.23		8	6.2698		8.9739
	9	5.9		7.46		9	3.2654		7.4032
	10	8.62		6.25		10	8.3032		8.8722
	11	8.85		5.81		11	7.2336		9.468
	12			6.8		12			6.9849
	P value compared to Cicf/f		P value=0.9320	P value=0.0383		P value compared to Cicf/f		P value=0.8333	P value=0.4783
	P value between Cicf/f;Cd4-cre and Cicf/f;Vav1-cre			P value=0.0346		P value between Cicf/f;Cd4-cre and Cicf/f;Vav1-cre			P value=0.8975
	CD8 SP %	Cicf/f	Cicf/f;Cd4-cre	Cicf/f;Vav1-cre		CD8 SP # (106 cells)	Cicf/f	Cicf/f;Cd4-cre	Cicf/f;Vav1-cre
	1	2.93	3.99	1.98		1	3.8383	3.9501	2.8908
	2	2.81	3.11	2.01		2	6.744	4.3851	2.0301
	3	2.79	2.76	2.41		3	7.0029	3.0912	4.2657
	4	3.43	2.76	1.96		4	5.9682	4.692	3.43
	5	2.06	2.66	1.32		5	2.6334	2.53	1.416
	6	1.69	2.3	1.45		6	2.0538	1.9712	1.8886
	7	1.56	2.44	1.61		7	0.735	2.7144	1.2367
	8	1.58		1.77		8	1.4288		2.5519
	9	1.55		2.24		9	0.8526		2.2288
	10	2.42		2.02		10	2.3326		2.8779
	11	2.4		1.73		11	1.9536		2.826
	12			1.94		12			1.989
	P value compared to Cicf/f		P value=0.0776	P value=0.1420		P value compared to Cicf/f		P value=0.9903	P value=0.4929
	P value between Cicf/f;Cd4-cre and Cicf/f;Vav1-cre			P value=0.0012		P value between Cicf/f;Cd4-cre and Cicf/f;Vav1-cre			P value=0.4960
	Analysis was done with 11, 7, and 12 independent samples for each group, respectively.
	Each experiment was repeated three times (biological replication) and pooled for presentation.

## Sheet: 1E
	Figure 1E. Total thymocyte numbers, and the frequencies and numbers of DN, DP, CD4 SP, and CD8 SP subsets from 1-week-old Cicf/f and Cicf/f;Vav1-Cre mice
	thymocytes # (106 cells)	Cicf/f	Cicf/f;Vav1-cre
	1	19.6	25.6
	2	22.6	22.1
	3	21	17.2
	4	27.2	25.4
	5	17.5
	P value compared to Cicf/f		P value=0.7061
	DN %	Cicf/f	Cicf/f;Vav1-cre		DN # (106 cells)	Cicf/f	Cicf/f;Vav1-cre
	1	6.02	6.11		1	1.15444	1.53856
	2	6.58	5.03		2	1.46448	1.08953
	3	5.84	7.34		3	1.1991	1.23668
	4	6.31	5.97		4	1.68368	1.48336
	5	7.24			5	1.218
	P value compared to Cicf/f		P value=0.5865		P value compared to Cicf/f		P value=0.9638
	DP %	Cicf/f	Cicf/f;Vav1-cre		DP # (106 cells)	Cicf/f	Cicf/f;Vav1-cre
	1	82.3	86.5		1	15.778	21.8112
	2	83.3	87.7		2	18.532	18.9839
	3	84	85.6		3	17.241	14.448
	4	82.2	86.3		4	21.896	21.4376
	5	80.4			5	13.545
	P value compared to Cicf/f		P value=0.0013		P value compared to Cicf/f		P value=0.4418
	CD4 SP %	Cicf/f	Cicf/f;Vav1-cre		CD4 SP # (105 cells)	Cicf/f	Cicf/f;Vav1-cre
	1	6.17	3.98		1	11.8188	10.0352
	2	4.67	3.41		2	10.396	7.3814
	3	5	3.1		3	10.248	5.2288
	4	5.17	4.04		4	13.7632	10.033
	5	5.93			5	9.975
	P value compared to Cicf/f		P value=0.0024		P value compared to Cicf/f		P value=0.05
	CD8 SP %	Cicf/f	Cicf/f;Vav1-cre		CD8 SP # (105 cells)	Cicf/f	Cicf/f;Vav1-cre
	1	1.43	0.56		1	2.744	1.408
	2	1.4	0.56		2	3.1188	1.2155
	3	1.28	0.59		3	2.625	0.9976
	4	1.61	0.7		4	4.2976	1.7272
	5	1.67			5	2.8
	P value compared to Cicf/f		P value<0.0001		P value compared to Cicf/f		P value=0.002
	Analysis was done with 5 and 4 independent samples for each group, respectively.
	Each experiment was repeated two times (biological replication) and representative data were shown.
