# Supplementary material for: Regulation of positive and negative selection and TCR signaling during thymic T cell development by capicua
Source: eLife journal article supplement (doi:10.7554/elife.71769), 2021-12-13
Supplement: supp [file elife-71769-supp-v1.zip › elife_poa_e71769_Figure_3_source_data_1.xlsx]

## Sheet: 3A
	Figure 3A. The frequency of post-positive selection subset (CD69+TCRβhi) of thymocytes from 7-week-old Cicf/f, Cicf/f;Cd4-Cre, and Cicf/f;Vav1-Cre mice
		Cicf/f	Cicf/f;Cd4-cre	Cicf/f;Vav1-cre
	1	6.86	6.55	3.8
	2	6.53	6.3	4.39
	3	6.42	4.7	4.35
	4	6.53	4.95	4.04
	P value compared to Cicf/f		P value=0.0968	P value=0.0005
	P value between Cicf/f;Cd4-cre and Cicf/f;Vav1-cre			P value=0.0133
	Analysis was done with 4 independent samples for each group.
	The experiment was repeated three times (biological replication) and representative data were shown.

## Sheet: 3B
	Figure 3B. The frequencies and numbers of thymic DN, DP, CD4+ SP (4SP), and CD8+ SP (8SP) cells from female H-Y;Cicf/f and H-Y;Cicf/f;Vav1-Cre mice
	DN %	H-Y;Cicf/f (F)	H-Y;Cicf/f;Vav1-cre (F)		DN # (106 cells)	H-Y;Cicf/f (F)	H-Y;Cicf/f;Vav1-cre (F)
	1	12.8	12.6		1	10.368	16.002
	2	11.1	10.9		2	10.323	9.919
	3	10.6	8.11		3	6.148	11.0296
	4		8.6		4		9.46
	P value compared to H-Y;Cicf/f (F)		P value=0.4212		P value compared to H-Y;Cicf/f (F)		P value=0.2674
	DP %	H-Y;Cicf/f (F)	H-Y;Cicf/f;Vav1-cre (F)		DP # (106 cells)	H-Y;Cicf/f (F)	H-Y;Cicf/f;Vav1-cre (F)
	1	63.8	62.2		1	51.678	78.994
	2	60.4	62.8		2	56.172	57.148
	3	55.8	67.8		3	32.364	92.208
	4		69.1		4		76.01
	P value compared to H-Y;Cicf/f (F)		P value=0.3344		P value compared to H-Y;Cicf/f (F)		P value=0.0383
	4SP %	H-Y;Cicf/f (F)	H-Y;Cicf/f;Vav1-cre (F)		4SP # (106 cells)	H-Y;Cicf/f (F)	H-Y;Cicf/f;Vav1-cre (F)
	1	9.76	11.4		1	7.9056	14.478
	2	9.42	11		2	8.7606	10.01
	3	13	9.69		3	7.54	13.1784
	4		10		4		11
	P value compared to H-Y;Cicf/f (F)		P value=0.8559		P value compared to H-Y;Cicf/f (F)		P value=0.0213
	8SP %	H-Y;Cicf/f (F)	H-Y;Cicf/f;Vav1-cre (F)		4SP # (106 cells)	H-Y;Cicf/f (F)	H-Y;Cicf/f;Vav1-cre (F)
	1	9.82	2.78		1	7.9542	3.5306
	2	15.4	3.65		2	14.322	3.3215
	3	14.7	3.93		3	8.526	5.3448
	4		3.59		4		3.949
	P value compared to H-Y;Cicf/f (F)		P value=0.0012		P value compared to H-Y;Cicf/f (F)		P value=0.0175
	Analysis was done with 3 and 4 independent samples for each group, respectively.
	Each experiment was repeated three times (biological replication) and representative data were shown.

## Sheet: 3C
	Figure 3C. The frequencies and numbers of thymic DN, DP, CD4+ SP (4SP), and CD8+ SP (8SP) cells from OT-Ⅱ;Cicf/f and OT-Ⅱ;Cicf/f;Vav1-Cre mice
	DN %	OT-Ⅱ;Cicf/f	OT-Ⅱ;Cicf/f;Vav1-cre		DN # (106 cells)	OT-Ⅱ;Cicf/f	OT-Ⅱ;Cicf/f;Vav1-cre
	1	10.8	8.1		1	9.072	4.293
	2	11.9	6.79		2	6.902	9.9813
	3	9.28	7.23		3	6.2176	7.953
	4	10.3	7.26		4	7.416	10.164
	5	12.9	6.89		5	3.741	6.201
	P value compared to OT-Ⅱ;Cicf/f		P value=0.0005		P value compared to OT-Ⅱ;Cicf/f		P value=0.4814
	DP %	OT-Ⅱ;Cicf/f	OT-Ⅱ;Cicf/f;Vav1-cre		DP # (106 cells)	OT-Ⅱ;Cicf/f	OT-Ⅱ;Cicf/f;Vav1-cre
	1	63.2	85		1	53.088	45.05
	2	71.8	84.8		2	41.644	124.656
	3	66.3	85		3	44.421	93.5
	4	58.7	85.5		4	42.264	119.7
	5	60.3	87.6		5	17.487	78.84
	P value compared to OT-Ⅱ;Cicf/f		P value<0.0001		P value compared to OT-Ⅱ;Cicf/f		P value=0.01
	4SP %	OT-Ⅱ;Cicf/f	OT-Ⅱ;Cicf/f;Vav1-cre		4SP # (106 cells)	OT-Ⅱ;Cicf/f	OT-Ⅱ;Cicf/f;Vav1-cre
	1	23.5	4.3		1	19.74	2.279
	2	14.5	6.81		2	8.41	10.0107
	3	23.2	6.42		3	15.544	7.062
	4	30.1	5.71		4	21.672	7.994
	5	25.8	3.33		5	7.482	2.997
	P value compared to OT-Ⅱ;Cicf/f		P value=0.0001		P value compared to OT-Ⅱ;Cicf/f		P value=0.0306
	8SP %	OT-Ⅱ;Cicf/f	OT-Ⅱ;Cicf/f;Vav1-cre		4SP # (106 cells)	OT-Ⅱ;Cicf/f	OT-Ⅱ;Cicf/f;Vav1-cre
	1	2.52	2.62		1	2.1168	1.3886
	2	1.85	1.56		2	1.073	2.2932
	3	1.15	1.35		3	0.7705	1.485
	4	0.93	1.57		4	0.6696	2.198
	5	0.93	2.22		5	0.2697	1.998
	P value compared to OT-Ⅱ;Cicf/f		P value=0.3513		P value compared to OT-Ⅱ;Cicf/f		P value=0.0392
	Analysis was done with 5 independent samples for each group.
	Each experiment was repeated three times (biological replication) and representative data were shown.
