# Supplementary material for: Regulation of positive and negative selection and TCR signaling during thymic T cell development by capicua
Source: eLife journal article supplement (doi:10.7554/elife.71769), 2021-12-13
Supplement: supp [file elife-71769-supp-v1.zip › elife_poa_e71769_Figure_4_source_data_1.xlsx]

## Sheet: 4A
	Figure 4A. Relative Bcl2 levels in thymic DN, DP, CD4+ SP (4SP), and CD8+ SP (8SP) cells from Cicf/f and Cicf/f;Vav1-Cre mice.
	Bcl2/Hprt	Cicf/f			Cicf/f;Vav1-cre			P value compared to Cicf/f
	DN	1	1	1	0.648247	0.854142	0.546462	P value=0.0248
	DP	1	1	1	2.79573	3.44515	2.61171	P value=0.0015
	4SP	1	1	1	1.13229	1.49665	1.15438	P value=0.0912
	8SP	1	1	1	1.12798	1.86675	1.11388	P value=0.2114
	Analysis was done with 3 independent samples for each group.
	Each experiment was repeated three times (biological replication) and pooled for presentation.

## Sheet: 4B
	Figure 4B. The frequency of Nur77+ DP cells and Nur77 MFI of total DP and Nur77+ DP thymocytes from Cicf/f and Cicf/f;Vav1-Cre mice.
	% of Nur77+	Cicf/f	Cicf/f;Vav1-cre
	1	44.8	30.6
	2	46	38.2
	3	47.2	40.5
	P value compared to Cicf/f		P value=0.0357
	Nur77 MFI of total DP	Cicf/f	Cicf/f;Vav1-cre
	1	2330	1522
	2	2395	1758
	3	2133	1867
	P value compared to Cicf/f		P value=0.0114
	Nur77 MFI of Nur77+ DP	Cicf/f	Cicf/f;Vav1-cre
	1	4322	3396
	2	4086	3797
	3	4505	3817
	P value compared to Cicf/f		P value=0.0257
	Analysis was done with 3 independent samples for each group.
	Each experiment was repeated three times (biological replication) and pooled for presentation.

## Sheet: 4C
	Figure 4C. The frequencies and numbers of thymic DN, DP, CD4+ SP (4SP), and CD8+ SP (8SP) cells from male H-Y;Cicf/f and H-Y;Cicf/f;Vav1-Cre mice
	DN %	H-Y;Cicf/f (M)	H-Y;Cicf/f;Vav1-cre (M)		DN # (106 cells)	H-Y;Cicf/f (M)	H-Y;Cicf/f;Vav1-cre (M)
	1	90.3	76.2		1	4.515	8.382
	2	83.7	70.1		2	5.859	14.721
	3	76.8	75.7		3	1.536	16.654
	4		29.5		4		8.85
	5		64.6		5		10.982
	6		77.1		6		26.214
	P value compared to H-Y;Cicf/f (M)		P value=0.1514		P value compared to H-Y;Cicf/f (M)		P value=0.0392
	DP %	H-Y;Cicf/f (M)	H-Y;Cicf/f;Vav1-cre (M)		DP # (106 cells)	H-Y;Cicf/f (M)	H-Y;Cicf/f;Vav1-cre (M)
	1	2.73	8.59		1	0.1365	0.9449
	2	4.83	11.4		2	0.3381	2.394
	3	6.61	8.74		3	0.1322	1.9228
	4		48.8		4		14.64
	5		17.8		5		3.026
	6		6.64		6		2.2576
	P value compared to H-Y;Cicf/f (M)		P value=0.243		P value compared to H-Y;Cicf/f (M)		P value=0.2363
	4SP %	H-Y;Cicf/f (M)	H-Y;Cicf/f;Vav1-cre (M)		4SP # (106 cells)	H-Y;Cicf/f (M)	H-Y;Cicf/f;Vav1-cre (M)
	1	5.39	8.16		1	0.2695	0.8976
	2	8.26	9.16		2	0.5782	1.9236
	3	13.3	8.33		3	0.266	1.8326
	4		4.76		4		1.428
	5		8.55		5		1.4535
	6		8.13		6		2.7642
	P value compared to H-Y;Cicf/f (M)		P value=0.5434		P value compared to H-Y;Cicf/f (M)		P value=0.0097
	8SP %	H-Y;Cicf/f (M)	H-Y;Cicf/f;Vav1-cre (M)		8SP # (106 cells)	H-Y;Cicf/f (M)	H-Y;Cicf/f;Vav1-cre (M)
	1	1.62	7.1		1	0.081	0.781
	2	3.23	9.43		2	0.2261	1.9803
	3	3.33	7.2		3	0.0666	1.584
	4		17		4		5.1
	5		9		5		1.53
	6		8.14		6		2.7676
	P value compared to H-Y;Cicf/f (M)		P value=0.0181		P value compared to H-Y;Cicf/f (M)		P value=0.0488
	Analysis was done with 3 and 6 independent samples for each group, respectively.
	Each experiment was repeated three times (biological replication) and representative data were shown.

## Sheet: 4D
	Figure 4D. The numbers of total thymocytes from male H-Y;Cicf/f and H-Y;Cicf/f;Vav1-Cre mice
	% of Nur77+	H-Y;Cicf/f (M)	H-Y;Cicf/f;Vav1-cre (M)
	1	5	11
	2	7	21
	3	2	22
	4		30
	5		17
	6		34
	P value compared to H-Y;Cicf/f (M)		P value=0.0102
	Analysis was done with 3 and 6 independent samples for each group, respectively.
	Each experiment was repeated three times (biological replication) and representative data were shown.
