# Supplementary material for: Regulation of positive and negative selection and TCR signaling during thymic T cell development by capicua
Source: eLife journal article supplement (doi:10.7554/elife.71769), 2021-12-13
Supplement: supp [file elife-71769-supp-v1.zip › elife_poa_e71769_Figure_5_source_data_1.xlsx]

## Sheet: 5A
	Figure 5A. CD5 expression in DP, CD4 SP, and CD8 SP cells from 7-week-old Cicf/f, Cicf/f;Cd4-Cre, and Cicf/f;Vav1-Cre mice
	DP	Cicf/f	Cicf/f;Cd4-cre	Cicf/f;Vav1-cre
	1	2723	3032	1720
	2	2886	2758	1633
	3	2979	2822	1606
	4	2795	2699	1703
	P value compared to Cicf/f		P value=0.9711	P value<0.0001
	P value between Cicf/f;Cd4-cre and Cicf/f;Vav1-cre			P value<0.0001
	CD4 SP	Cicf/f	Cicf/f;Cd4-cre	Cicf/f;Vav1-cre
	1	13504	13524	12648
	2	13881	13104	12847
	3	14694	13103	12081
	4	13665	14253	12917
	P value compared to Cicf/f		P value=0.4438	P value=0.0106
	P value between Cicf/f;Cd4-cre and Cicf/f;Vav1-cre			P value=0.0758
	CD8 SP	Cicf/f	Cicf/f;Cd4-cre	Cicf/f;Vav1-cre
	1	5902	5593	6312
	2	6078	5857	6300
	3	6325	5645	5684
	4	5730	6359	6088
	P value compared to Cicf/f		P value=0.7799	P value=0.9127
	P value between Cicf/f;Cd4-cre and Cicf/f;Vav1-cre			P value=0.5431
	Analysis was done with 4 independent samples for each group.
	Each experiment was repeated three times (biological replication) and representative data were shown.

## Sheet: 5B
	Figure 5B. The frequency of CD69+ population of DP cells from 7-week-old Cicf/f and Cicf/f;Vav1-Cre mice
		Cicf/f	Cicf/f;Vav1-cre
	1	2.72	1.3
	2	2.75	1.01
	3	2.07	0.93
	4	2.87
	P value compared to Cicf/f		P value=0.0013
	Analysis was done with 4 and 3 independent samples for each group, respectively.
	The experiment was repeated three times (biological replication) and representative data were shown.

## Sheet: 5C
	Figure 5C. CD5 expression in CD69+ and CD69- DP cells from 7-week-old Cicf/f and Cicf/f;Vav1-Cre mice
	CD69+	Cicf/f	Cicf/f;Vav1-cre		CD69-	Cicf/f	Cicf/f;Vav1-cre
	1	7989	8783		1	1655	976
	2	8405	8474		2	1751	922
	3	8052	8135		3	1600	1000
	4	7898			4	1691
	P value compared to Cicf/f		P value=0.1235		P value compared to Cicf/f		P value<0.0001
	Analysis was done with 4 and 3 independent samples for each group, respectively.
	The experiment was repeated three times (biological replication) and representative data were shown.

## Sheet: 5F
	Figure 5F. Activation of TCR signaling components in DP thymocytes from Cicf/f, Cicf/f;Cd4-Cre, and Cicf/f;Vav1-Cre mice
											P value
	p-ERK/t-ERK	Cicf/f			Cicf/f;Cd4-cre			Cicf/f;Vav1-cre			Cicf/f vs Cicf/f;Cd4-cre	Cicf/f vs Cicf/f;Vav1-cre	Cicf/f;Cd4-cre vs Cicf/f;Vav1-cre
	0min	1	1	1	0.619613	1.7053	1.92385	2.07776	2.85551	4.00099	P value=0.9874	P value=0.7531	P value=0.8373
	2min	43.7127	48.1846	43.7321	25.8454	40.0198	45.5707	8.09754	12.2372	13.6748	P value=0.0188	P value<0.0001	P value<0.0001
	5min	1.35911	1.29915	4.51793	0.919845	2.07616	3.86686	1.35912	2.66608	4.50384	P value=0.9992	P value=0.9852	P value=0.9776
	15min	1.94526	3.5257	3.40279	0.913135	2.39955	4.50914	1.63918	2.4077	5.01498	P value=0.9910	P value=0.9997	P value=0.9875
											P value
	p-PLCg1/t-PLCg1	Cicf/f			Cicf/f;Cd4-cre			Cicf/f;Vav1-cre			Cicf/f vs Cicf/f;Cd4-cre	Cicf/f vs Cicf/f;Vav1-cre	Cicf/f;Cd4-cre vs Cicf/f;Vav1-cre
	0min	1	1	1	0.909614	0.788578	0.742792	0.828796	0.658138	0.438532	P value=0.9628	P value=0.8699	P value=0.9683
	2min	5.5238	4.80531	4.44938	3.91256	2.70726	5.39515	5.08927	1.7872	3.42894	P value=0.4105	P value=0.1112	P value=0.7052
	5min	3.75817	3.3531	3.2067	3.12141	2.14665	5.3879	2.40222	1.39949	3.32159	P value=0.9862	P value=0.3090	P value=0.2417
	15min	1.26154	1.83333	1.29597	2.11051	1.18968	1.76941	1.31872	0.685413	0.885592	P value=0.9457	P value=0.7632	P value=0.5698
											P value
	p-ZAP-70/t-ZAP-70	Cicf/f			Cicf/f;Cd4-cre			Cicf/f;Vav1-cre			Cicf/f vs Cicf/f;Cd4-cre	Cicf/f vs Cicf/f;Vav1-cre	Cicf/f;Cd4-cre vs Cicf/f;Vav1-cre
	0min	1	1	1	1.58246	0.976926	0.77578	0.490505	1.02042	1.0124	P value=0.9911	P value=0.9820	P value=0.9487
	2min	4.51423	4.40047	4.03777	2.61156	4.69225	3.86237	4.58317	3.44937	3.86791	P value=0.7769	P value=0.9155	P value=0.9578
	5min	4.64073	6.99221	6.4871	3.4756	3.66391	6.03255	2.59694	5.88393	6.21479	P value=0.1646	P value=0.4063	P value=0.8317
	15min	4.27506	6.65388	2.92773	4.55344	4.84567	3.38395	3.45596	2.57789	2.45745	P value=0.9122	P value=0.1233	P value=0.2506
											P value
	p-JNK/t-JNK	Cicf/f			Cicf/f;Cd4-cre			Cicf/f;Vav1-cre			Cicf/f vs Cicf/f;Cd4-cre	Cicf/f vs Cicf/f;Vav1-cre	Cicf/f;Cd4-cre vs Cicf/f;Vav1-cre
	0min	1	1	1	0.941218	1.27189	1.16099	1.09037	1.51676	1.43639	P value=0.7419	P value=0.1183	P value=0.3951
	2min	1.35394	1.13332	1.15397	1.02371	1.71999	1.31001	1.12125	1.4165	1.17376	P value=0.6964	P value=0.9894	P value=0.7785
	5min	1.41749	1.13419	1.24509	1.16773	1.37412	1.16528	1.05754	1.49006	1.32833	P value=0.9828	P value=0.9865	P value=0.9404
	15min	0.756448	0.729977	0.595166	0.598912	1.13667	0.641546	0.624855	0.688579	1.16982	P value=0.8292	P value=0.7093	P value=0.9760
											P value
	p-p38/t-p38	Cicf/f			Cicf/f;Cd4-cre			Cicf/f;Vav1-cre			Cicf/f vs Cicf/f;Cd4-cre	Cicf/f vs Cicf/f;Vav1-cre	Cicf/f;Cd4-cre vs Cicf/f;Vav1-cre
	0min	1	1	1	1.05337	0.76123	1.30918	2.4594	1.15845	1.84945	P value=0.9833	P value=0.0052	P value=0.0079
	2min	1.07206	0.854923	0.796593	1.18303	0.689554	1.01404	1.62153	0.940942	1.43239	P value=0.9712	P value=0.1920	P value=0.2792
	5min	0.802581	0.585202	0.457425	0.825459	0.57848	0.738482	1.25082	0.671453	1.03615	P value=0.9077	P value=0.2762	P value=0.4917
	15min	0.758943	0.434478	0.371332	0.532742	0.360532	0.501877	1.08408	0.421958	0.82677	P value=0.9689	P value=0.5320	P value=0.3954
	Analysis was done with 3 independent samples for each group.
	Each experiment was repeated three times (biological replication) and pooled for presentation.
