# Supplementary material for: Regulation of positive and negative selection and TCR signaling during thymic T cell development by capicua
Source: eLife journal article supplement (doi:10.7554/elife.71769), 2021-12-13
Supplement: supp [file elife-71769-supp-v1.zip › elife_poa_e71769_Figure_6_source_data_1.xlsx]

## Sheet: 6A
	Figure 6A. The frequency of WT or Cic KO BM-originated cells in the mixed BM chimeras
		WT	KO
	1	41.9	50.9
	2	53.9	35.8
	3	64.7	24
	4	51.6	27
	5	72.1	27.1
	6	71.2	27.3
	7	76.9	21.3
	8	80.2	18.3
	9	74.7	23.4
	10	91	7.63
	P value compared to WT		P value=0.0006
	Analysis was done with 10 independent samples for each group.
	Each experiment was repeated two times (biological replication) and pooled for presentation.

## Sheet: 6B
	Figure 6B. The frequency of WT or Cic KO BM-originated DN1-4 cells in the mixed BM chimeras
	DN1	WT	KO		DN2	WT	KO
	1	2.89	0.89		1	7.71	28.9
	2	2.59	1.43		2	14.8	27.9
	3	2.05	1.57		3	6.31	19.4
	4	2.64	0.87		4	16.5	46
	5	1.43	0.94		5	14.5	22.8
	P value compared to WT		P value=0.0044		P value compared to WT		P value=0.0095
	DN3	WT	KO		DN4	WT	KO
	1	64.3	54.6		1	25.1	15.6
	2	55.3	61.6		2	27.3	9.12
	3	54.9	64.5		3	36.8	14.5
	4	60.1	46.1		4	20.7	7.04
	5	66.8	66		5	17.3	10.3
	P value compared to WT		P value=0.7046		P value compared to WT		P value=0.0051
	Analysis was done with 5 independent samples for each group.
	Each experiment was repeated two times (biological replication) and representative data were shown.

## Sheet: 6C
	Figure 6C. The frequency of WT or Cic KO BM-originated DN, DP, CD4 SP, and CD8 SP cells in the mixed BM chimeras
	DN	WT	KO		DP	WT	KO
	1	1.2	1.36		1	79.6	79.4
	2	2.85	2.23		2	74.9	83.9
	3	1.84	2.66		3	79.1	78.8
	4	1.57	2.15		4	71.5	82.9
	P value compared to WT		P value=0.6167		P value compared to WT		P value=0.0728
	CD4 SP	WT	KO		CD8 SP	WT	KO
	1	16.1	15.4		1	3.1	3.83
	2	18.3	12		2	3.99	1.83
	3	15.8	15.5		3	3.29	3.06
	4	21.4	12.6		4	5.53	2.34
	P value compared to WT		P value=0.0442		P value compared to WT		P value=0.1353
	Analysis was done with 4 independent samples for each group.
	Each experiment was repeated two times (biological replication) and representative data were shown.

## Sheet: 6D
	Figure 6D. The frequency of WT or Cic KO BM-originated post-positive selection subset (CD69+TCRβhi) of thymocytes in the mixed BM chimeras
		WT	KO
	1	10.3	5.2
	2	10.6	5.31
	3	10.8	7.65
	4	13.8	5.16
	P value compared to WT		P value=0.0016
	Analysis was done with 4 independent samples for each group.
	Each experiment was repeated two times (biological replication) and representative data were shown.

## Sheet: 6E
	Figure 6E. CD5 MFI in DP, CD4 SP, and CD8 SP thymocytes derived from WT and KO BM cells in the mixed BM chimeric mice.
	DP	WT	KO
	1	3352	1439
	2	3607	2143
	3	3837	2663
	4	3663	2131
	P value compared to WT		P value=0.0014
	CD4 SP	WT	KO
	1	18122	13974
	2	18773	14875
	3	19971	17046
	4	19540	15004
	P value compared to WT		P value=0.0023
	CD4 SP	WT	KO
	1	9343	8170
	2	9538	8540
	3	10136	8848
	4	9864	9082
	P value compared to WT		P value=0.007
	Analysis was done with 4 independent samples for each group.
	Each experiment was repeated two times (biological replication) and representative data were shown.
