# Supplementary material for: Regulation of positive and negative selection and TCR signaling during thymic T cell development by capicua
Source: eLife journal article supplement (doi:10.7554/elife.71769), 2021-12-13
Supplement: supp [file elife-71769-supp-v1.zip › elife_poa_e71769_Figure_7_source_data_1.xlsx]

## Sheet: 7B
	Figure 7B. Relative levels of Spry4, Dusp4, Dusp6, and Spred1 in DN, DP, CD4+ SP (4SP), and CD8+ SP (8SP) cells of Cicf/f and Cicf/f;Vav1-Cre mice.
	Spry4/Hprt	Cicf/f			Cicf/f;Vav1-cre			P value compared to Cicf/f
	DN	1	1	1	35.094	40.2626	18.8374	P value=0.0092
	DP	1	1	1	27.6868	66.466	62.5627	P value=0.0142
	4SP	1	1	1	37.6513	23.8669	29.1421	P value=0.0019
	8SP	1	1	1	20.666	23.7662	28.4528	P value=0.0005
	Dusp4/Hprt	Cicf/f			Cicf/f;Vav1-cre			P value compared to Cicf/f
	DN	1	1	1	4.3441	4.71681	4.73224	P value<0.0001
	DP	1	1	1	7.01969	6.78439	5.12775	P value=0.0009
	4SP	1	1	1	4.2268	10.3635	4.40995	P value=0.0572
	8SP	1	1	1	9.44328	13.6576	8.56171	P value=0.0037
	Dusp6/Hprt	Cicf/f			Cicf/f;Vav1-cre			P value compared to Cicf/f
	DN	1	1	1	5.2284	7.01859	4.16632	P value=0.0058
	DP	1	1	1	4.72631	5.64634	5.22495	P value<0.0001
	4SP	1	1	1	1.79772	1.90401	1.76382	P value<0.0001
	8SP	1	1	1	3.13297	2.21217	2.44351	P value=0.0045
	Spred1/Hprt	Cicf/f			Cicf/f;Vav1-cre			P value compared to Cicf/f
	DN	1	1	1	4.1298	3.17978	2.68981	P value=0.0053
	DP	1	1	1	2.66255	3.04684	2.90115	P value<0.0001
	4SP	1	1	1	2.43676	2.59604	2.57699	P value<0.0001
	8SP	1	1	1	3.31751	2.81206	2.46341	P value=0.0017
	Analysis was done with 3 independent samples for each group.
	Each experiment was repeated three times (biological replication) and pooled for presentation.

## Sheet: 7C
	Figure 7C. The relative MFI of p-ERK in DP thymocytes transduced with CTRL, SPRY4, or DUSP6 expressing virus.
	p-ERK MFI (stim/unstim)	CTRL	SPRY4	DUSP6
	1	3.88281	1.96618	1.88976
	2	4.38793	1.45029	1.72362
	3	2.67273	1.22254	1.10284
	P value compared to Cicf/f		P value=0.0126	P value=0.0133
	P value between Cicf/f;Cd4-cre and Cicf/f;Vav1-cre			P value=0.9985
	Analysis was done with 3 independent samples for each group.
	Each experiment was repeated three times (biological replication) and pooled for presentation.

## Sheet: 7E
	Figure 7E. CD5 levels in DP thymocytes transduced with CTRL, SPRY4, or DUSP6 expressing virus.
	CD5 MFI	CTRL	SPRY4	DUSP6
	1	1626	769	1592
	2	1935	869	1877
	3	1682	651	1543
	P value compared to Cicf/f		P value=0.0006	P value=0.8198
	P value between Cicf/f;Cd4-cre and Cicf/f;Vav1-cre			P value=0.0009
	Analysis was done with 3 independent samples for each group.
	Each experiment was repeated three times (biological replication) and pooled for presentation.

## Sheet: 7F
	Figure 7F. The frequency of post-positive selection subset (CD69+TCRβhi) of thymocytes from 7-week-old Cicf/f, Cicf/f;Vav1-Cre, and Spry4-/-;Cicf/f;Vav1-Cre mice
		Cicf/f	Cicf/f;Vav1-cre	Spry4-/-;Cicf/f;Vav1-cre
	1	6.18	4.84	6.54
	2	6.3	3.59	5.9
	3	6.02	4.97	4.83
	4	6.81	5.03	5.55
	5		3.67
	6		4.4
	P value compared to Cicf/f		P value=0.0012	P value=0.3443
	P value between Cicf/f;Vav1-cre and Spry4-/-;Cicf/f;Vav1-cre			P value=0.0173
	Analysis was done with 4, 6, and 4 independent samples for each group, respectively.
	Each experiment was repeated three times (biological replication) and pooled for presentation.

## Sheet: 7G
	Figure 7G. CD5 MFI of DP thymocytes from 7-week-old Cicf/f, Cicf/f;Vav1-Cre, and Spry4-/-;Cicf/f;Vav1-Cre mice
		Cicf/f	Cicf/f;Vav1-cre	Spry4-/-;Cicf/f;Vav1-cre
	1	9326	5978	7271
	2	9288	5928	7558
	3	9865	6455	6785
	4		6662
	5		6280
	P value compared to Cicf/f		P value<0.0001	P value<0.0001
	P value between Cicf/f;Vav1-cre and Spry4-/-;Cicf/f;Vav1-cre			P value=0.0121
	Analysis was done with 3, 5, and 3 independent samples for each group, respectively.
	Each experiment was repeated three times (biological replication) and representative data were shown.
