# Supplementary material for: Regulation of positive and negative selection and TCR signaling during thymic T cell development by capicua
Source: eLife journal article supplement (doi:10.7554/elife.71769), 2021-12-13
Supplement: supp [file elife-71769-supp-v1.zip › elife_poa_e71769_Supplementary_file_4.pdf]

# Supplementary file 4

**A**

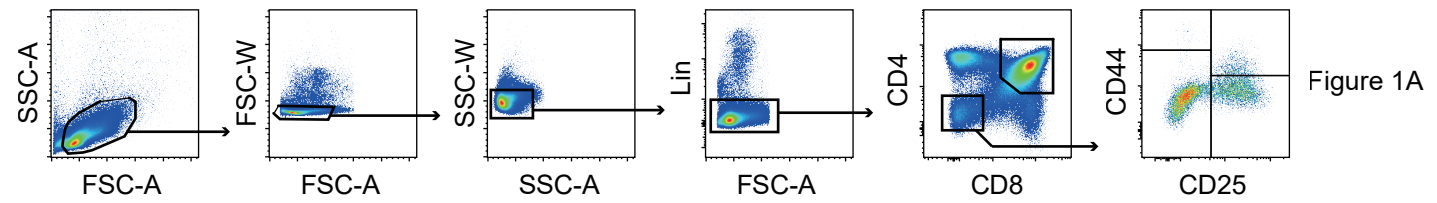

**B**

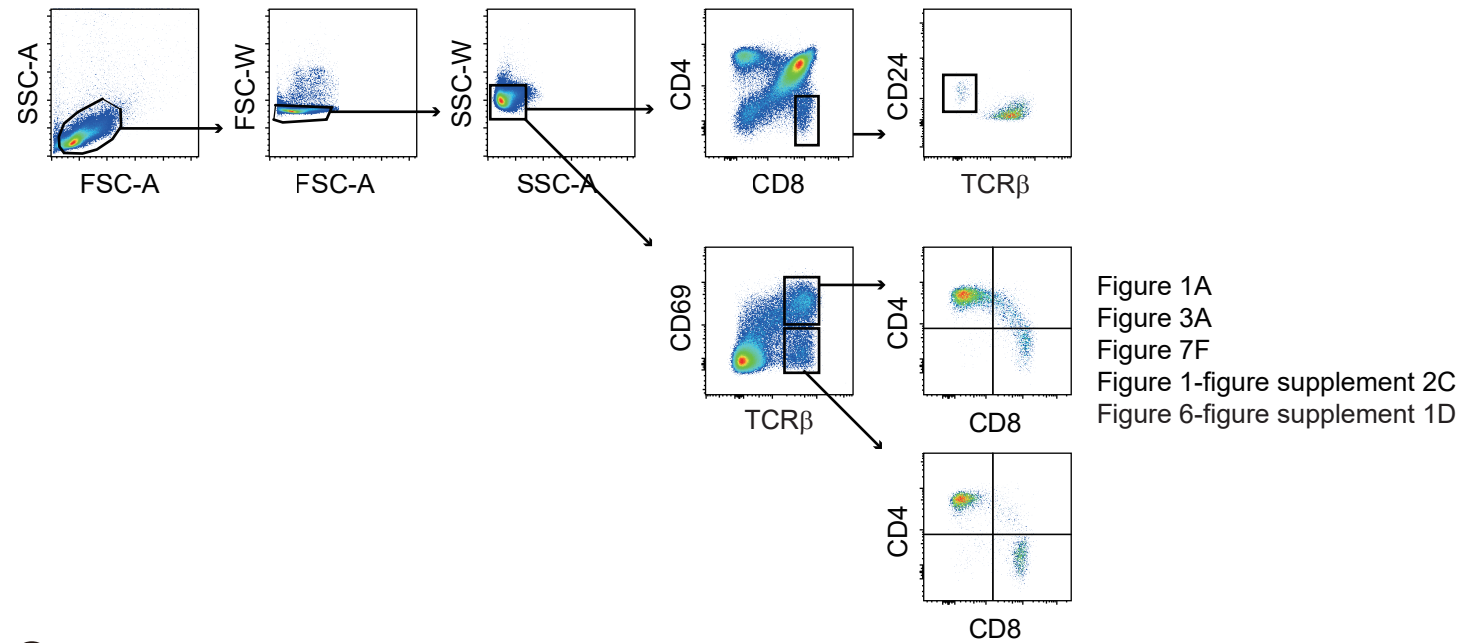

**C**

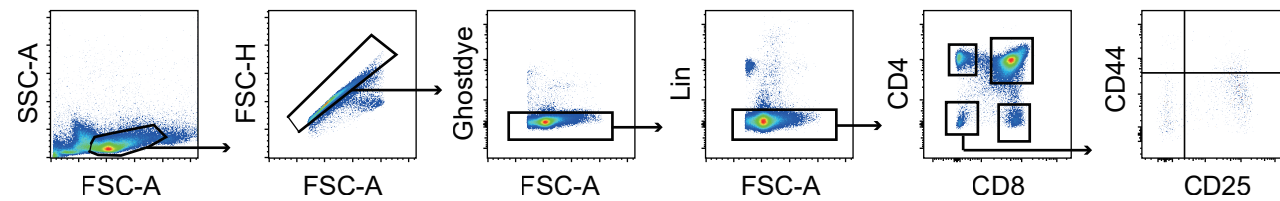

**D**

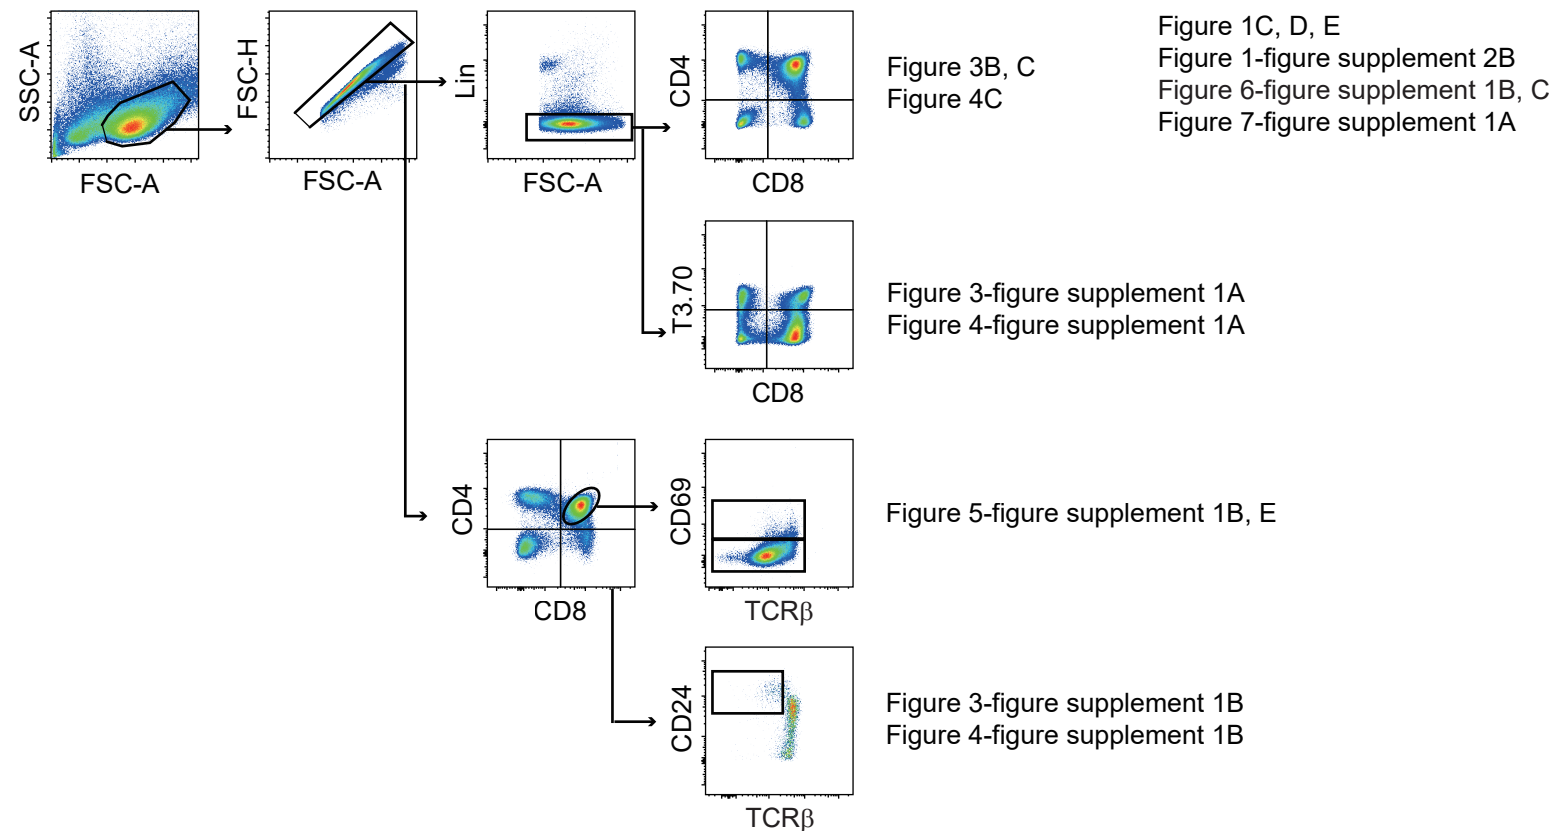

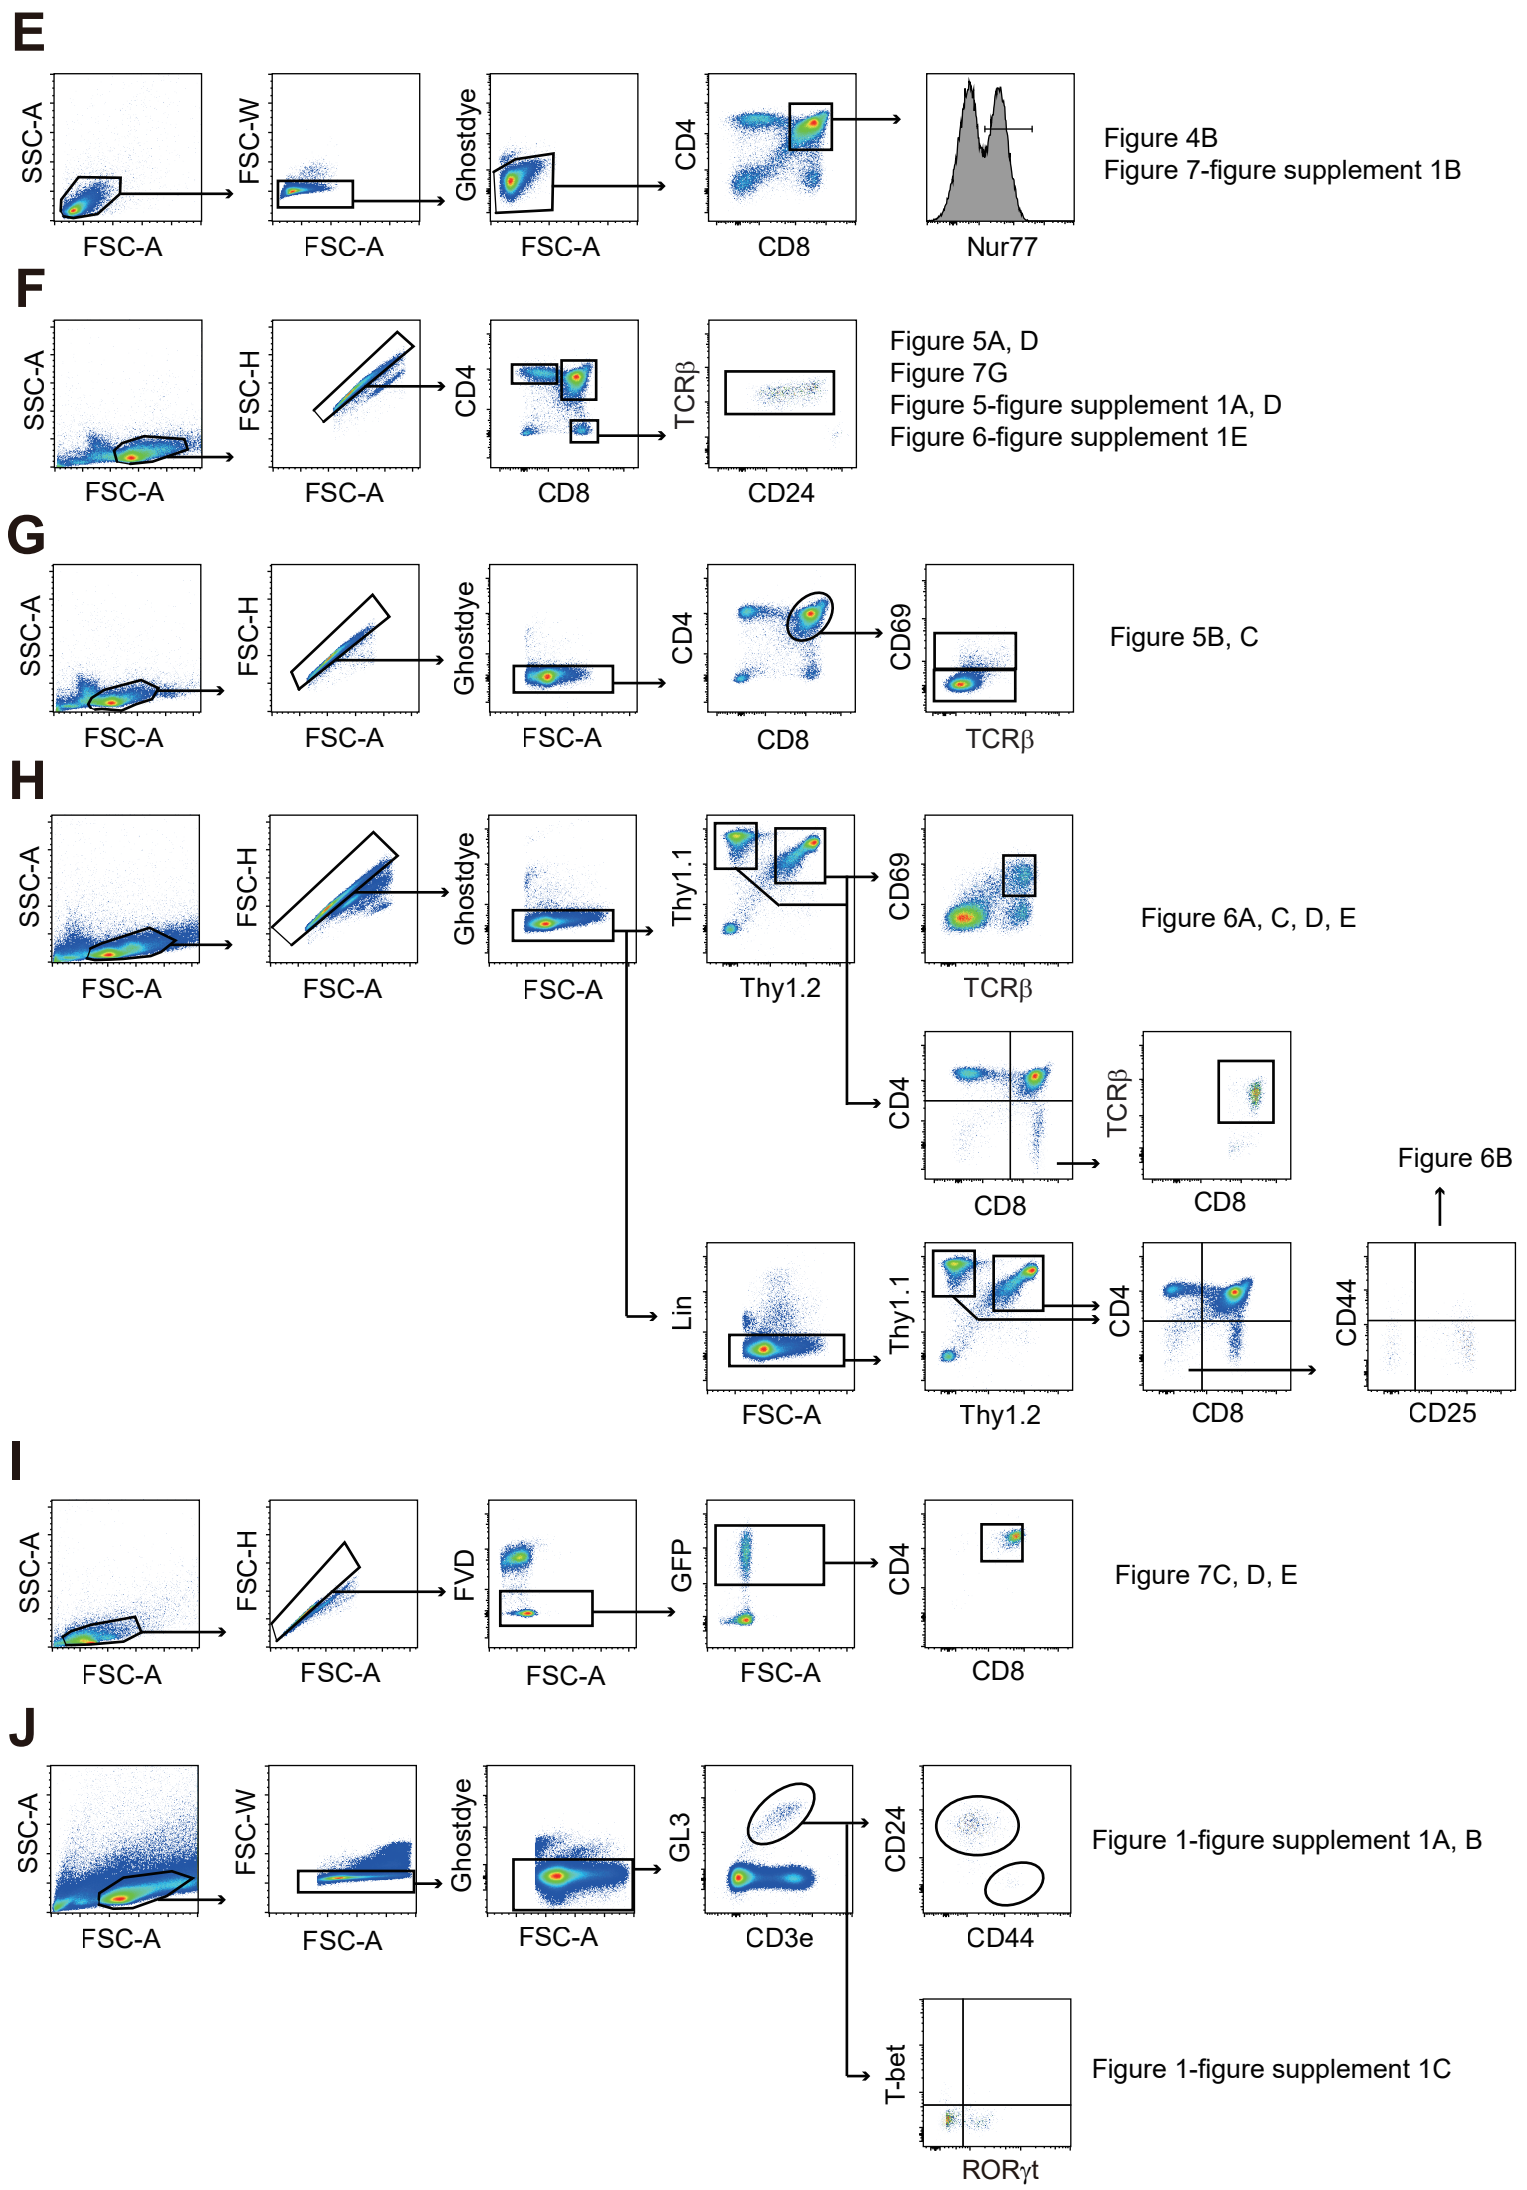

**K**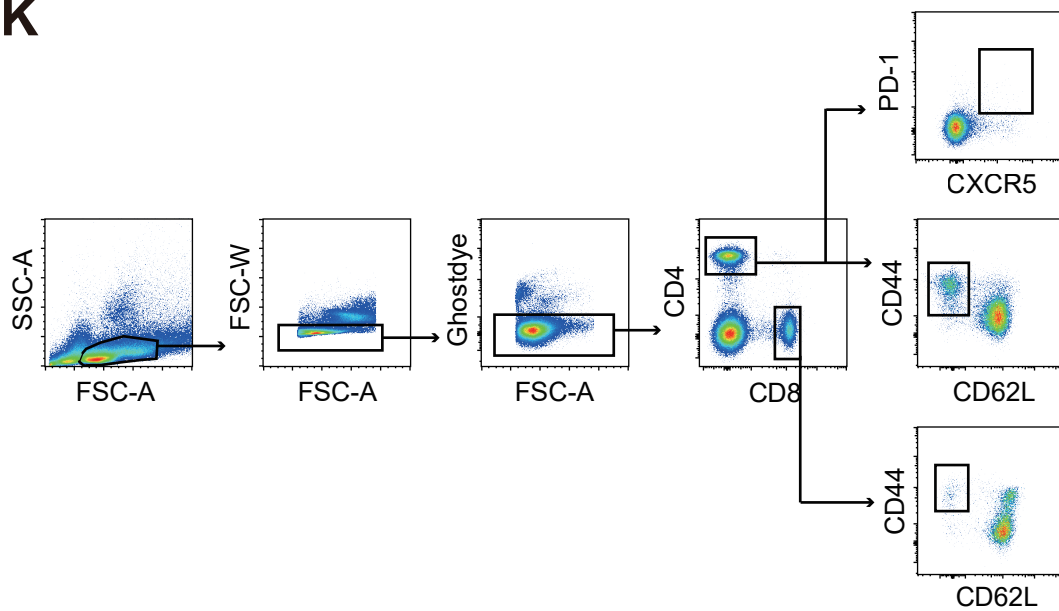

Figure 1-figure supplement 2A  
Figure 7-figure supplement 7C, D

**L**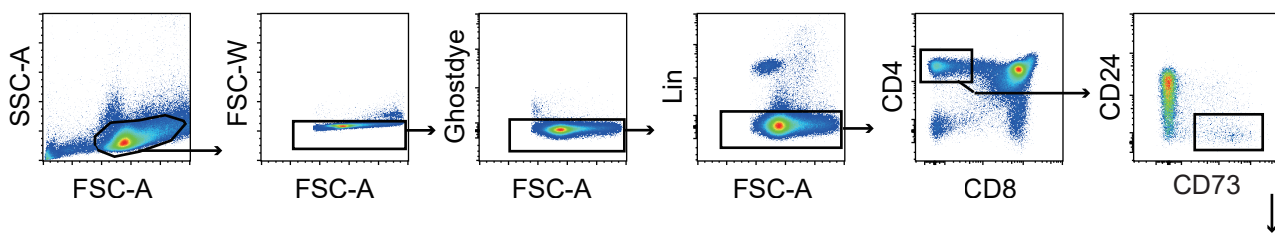

Figure 1-figure supplement 3A, B

**M**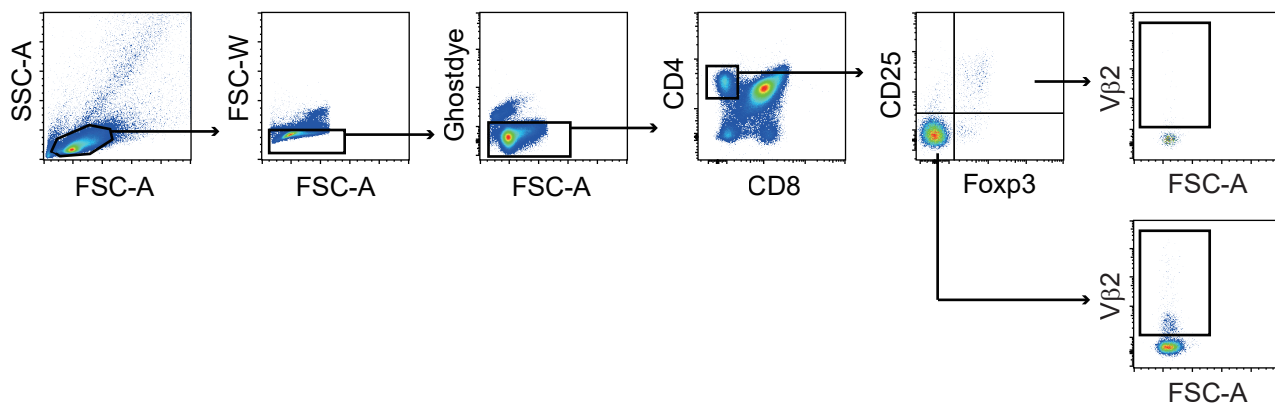

Figure 4-figure supplement 2A, B

#### Supplementary file 4. Flow cytometry gating strategy.

- (A) Sequential gating strategy for CD44<sup>-</sup> and CD25-expressing double-negative (DN) cells from *Cic<sup>FLAG/FLAG</sup>* mice.
- (B) Sequential gating strategy used for CD24<sup>hi</sup>TCRβ<sup>lo</sup> immature single-positive (ISP) cells and T cells expressing CD69 and TCRβ.
- (C) Sequential gating strategy for DP, CD4 SP, CD8 SP, and DN cells expressing CD44 and CD25.
- (D) Sequential gating strategy for T cells from TCR transgenic mice.
- (E) Sequential gating strategy for Nur77 expression analysis in double-positive (DP) cells.
- (F) Sequential gating strategy for CD5 expression analysis in DP, CD4 SP, and CD8 SP (TCRβ<sup>hi</sup>) cells.
- (G) Sequential gating strategy for CD69<sup>+</sup> and CD69<sup>-</sup> DP cells.
- (H) Sequential gating strategy for analysis of T cells from mixed bone marrow (BM) chimeric mice.
- (I) Sequential gating strategy for GFP<sup>+</sup> DP cells.
- (J) Sequential gating strategy for γδT cells expressing CD24, CD44, T-bet, and RORγt.
- (K) Sequential gating strategy for splenic T cells expressing CD44 and CD62L.
- (L) Sequential gating strategy for CD73<sup>+</sup>CD24<sup>lo</sup>CD4<sup>+</sup> T cells.
- (M) Sequential gating strategy for CD4<sup>+</sup> non-Treg and Treg Vβ2 chain. Other Vβ chains were gated with the same gating strategy.
