# Supplementary material for: Regulation of positive and negative selection and TCR signaling during thymic T cell development by capicua
Source: eLife journal article supplement (doi:10.7554/elife.71769), 2021-12-13
Supplement: supp4 [file elife-71769-supp4-v2.pdf]

# Supplementary file 4

**A**

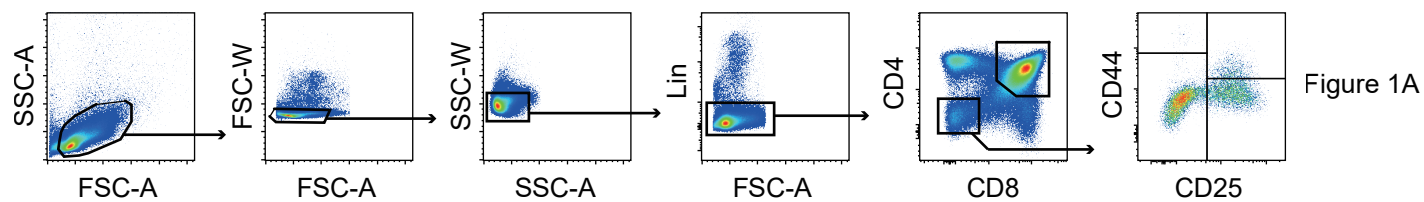

**B**

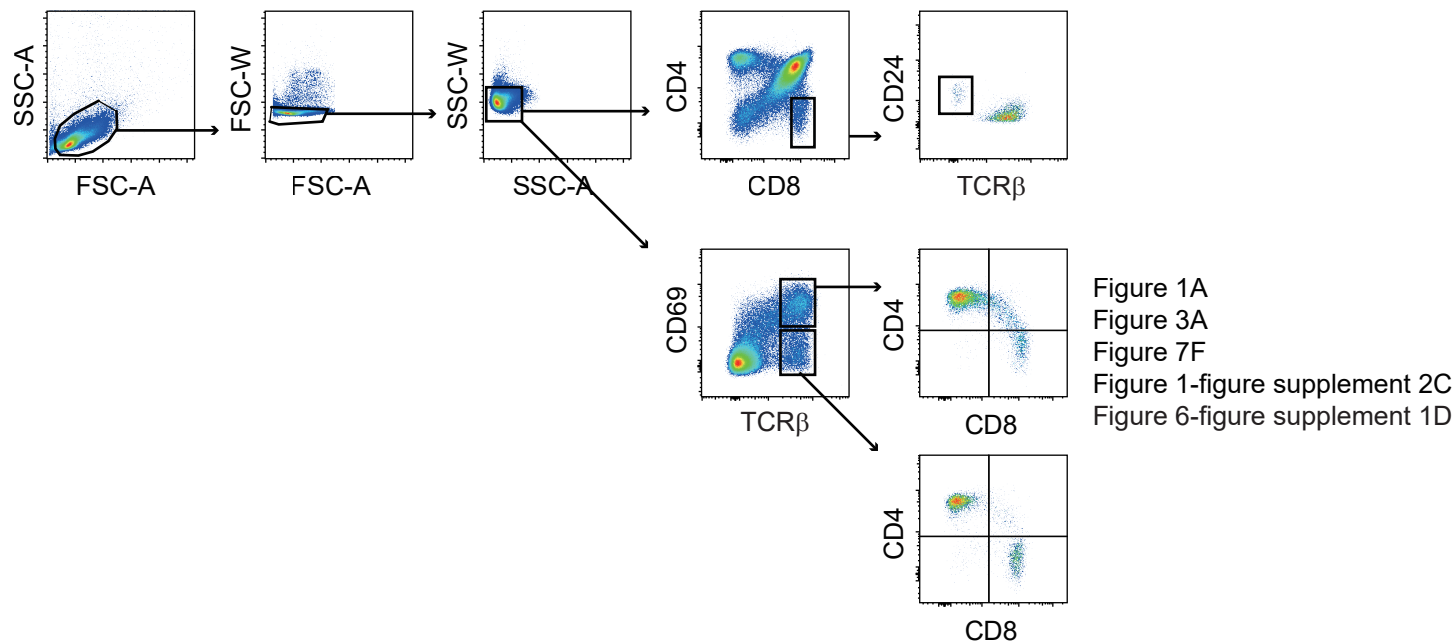

**C**

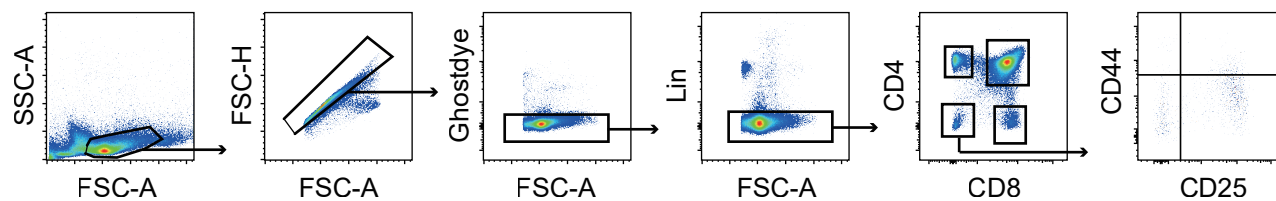

**D**

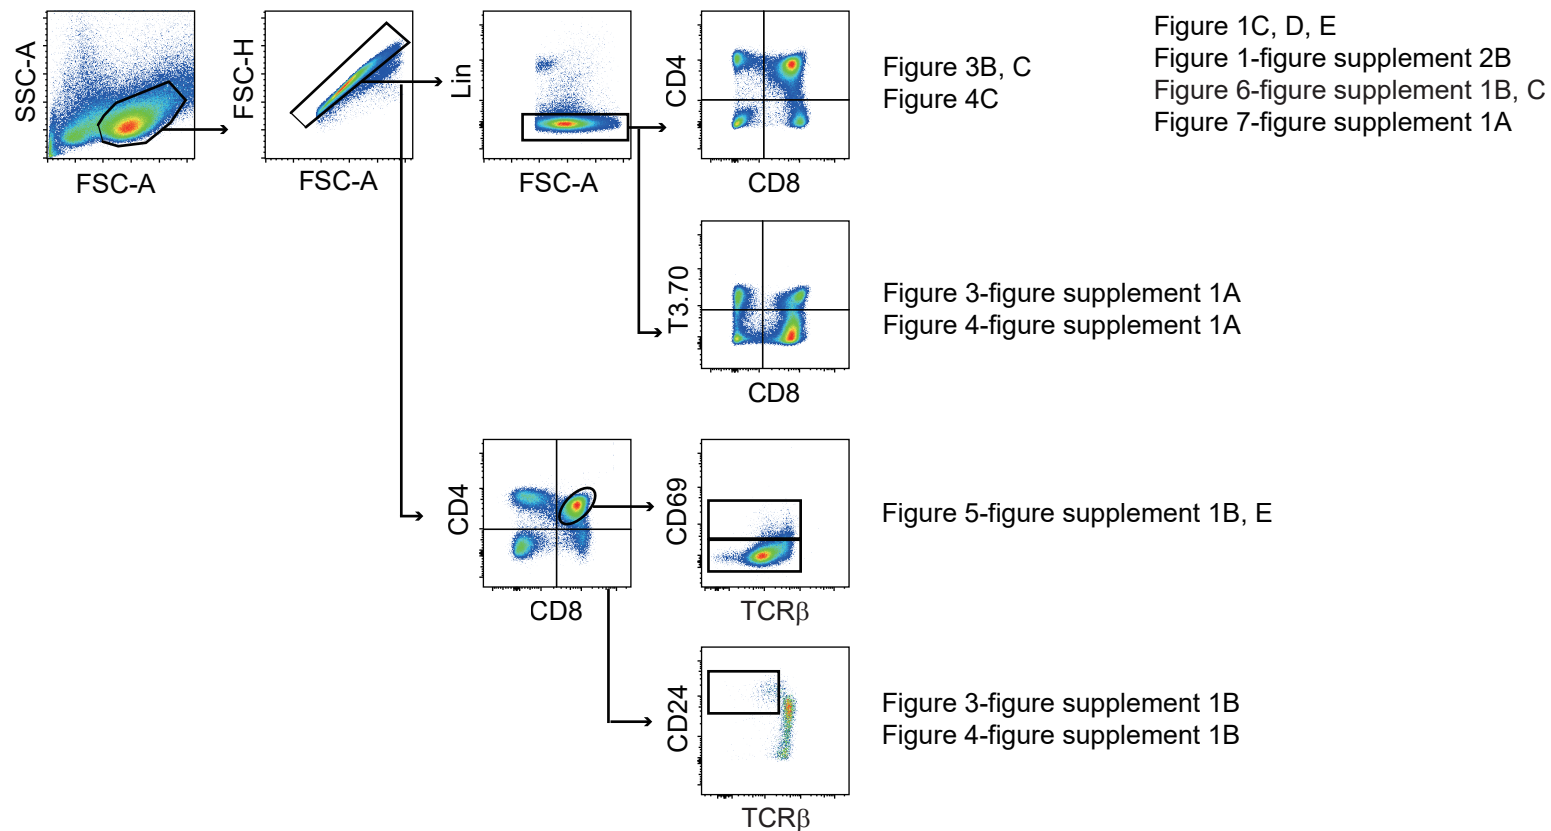

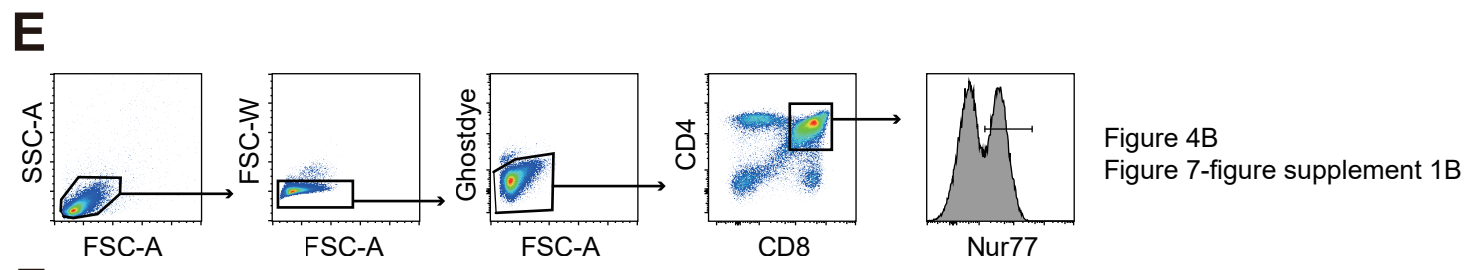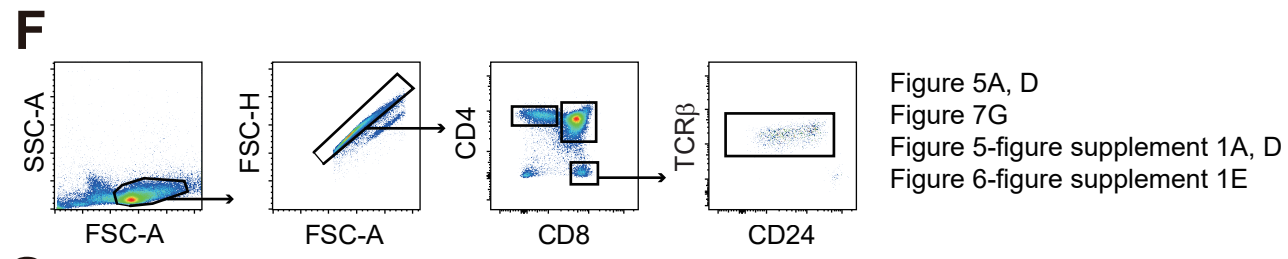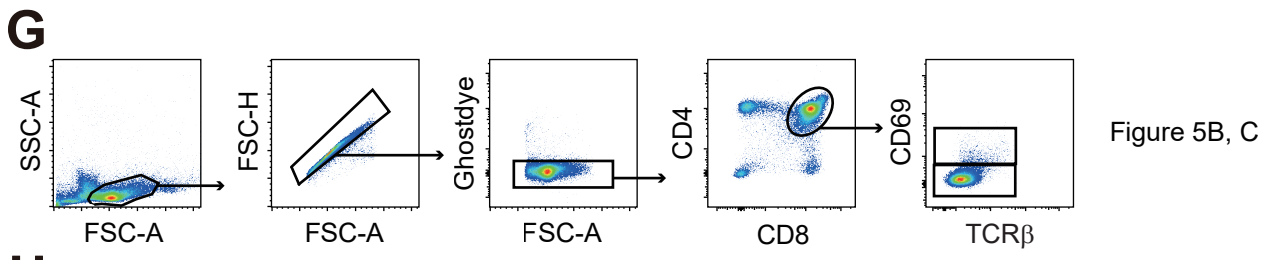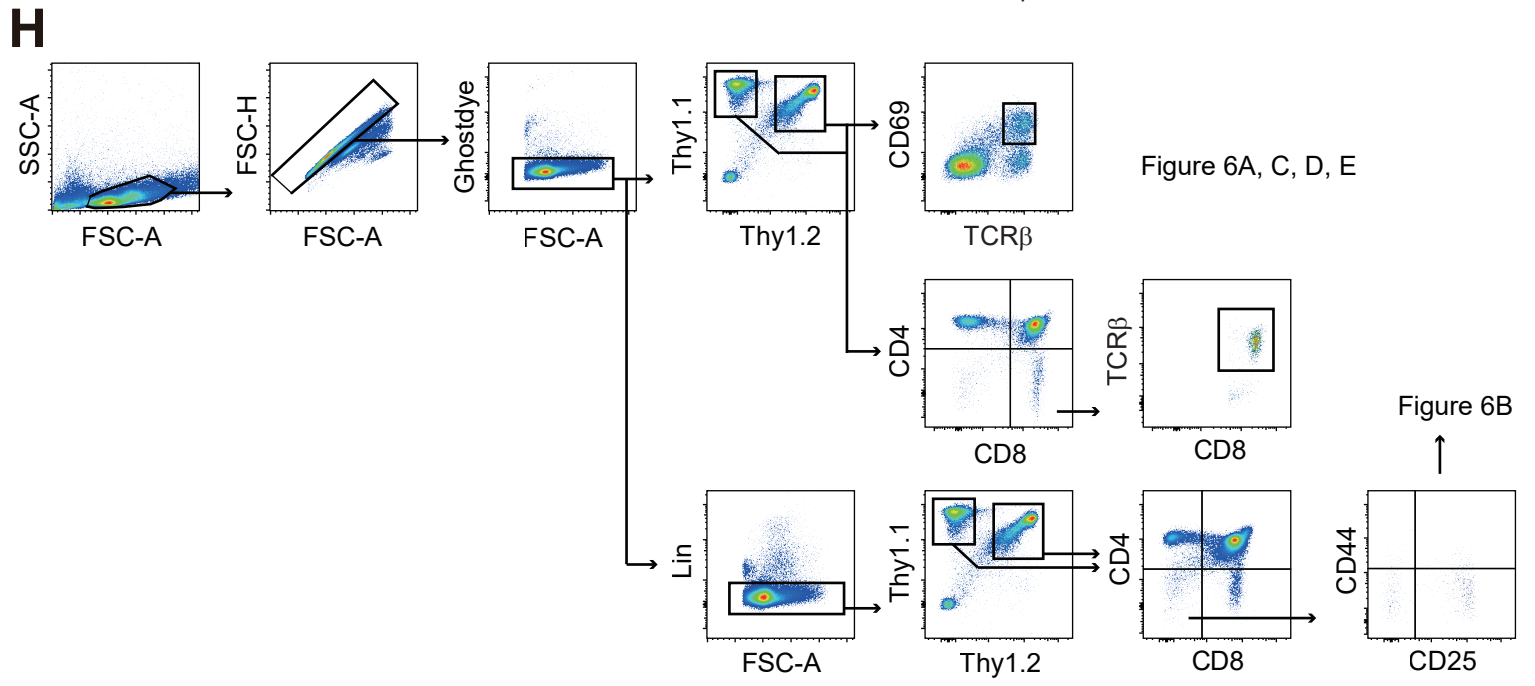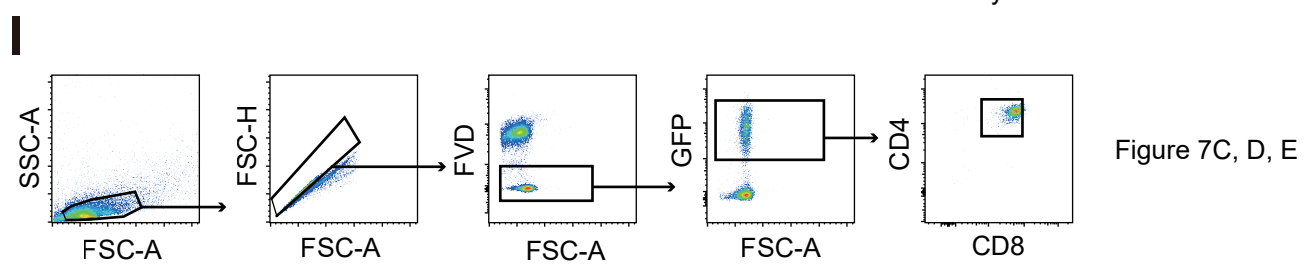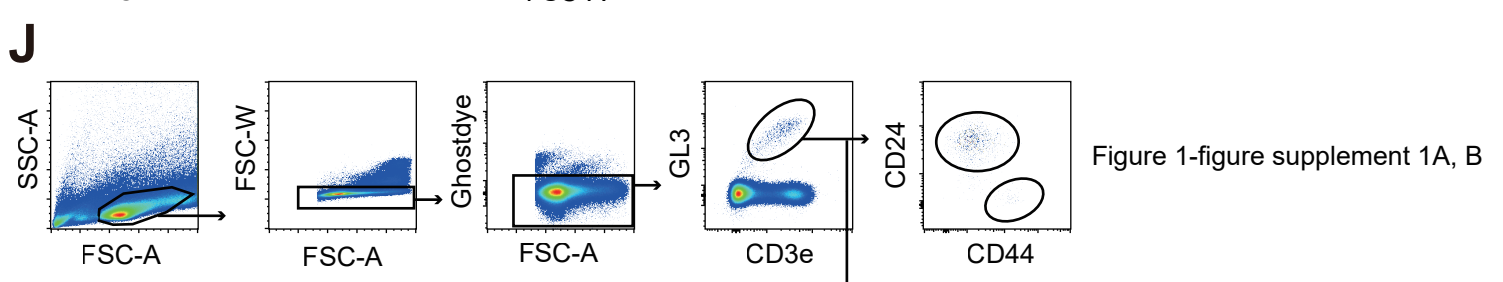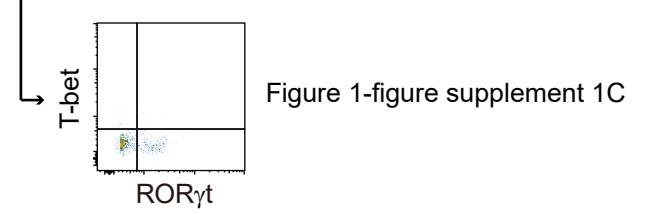

**K**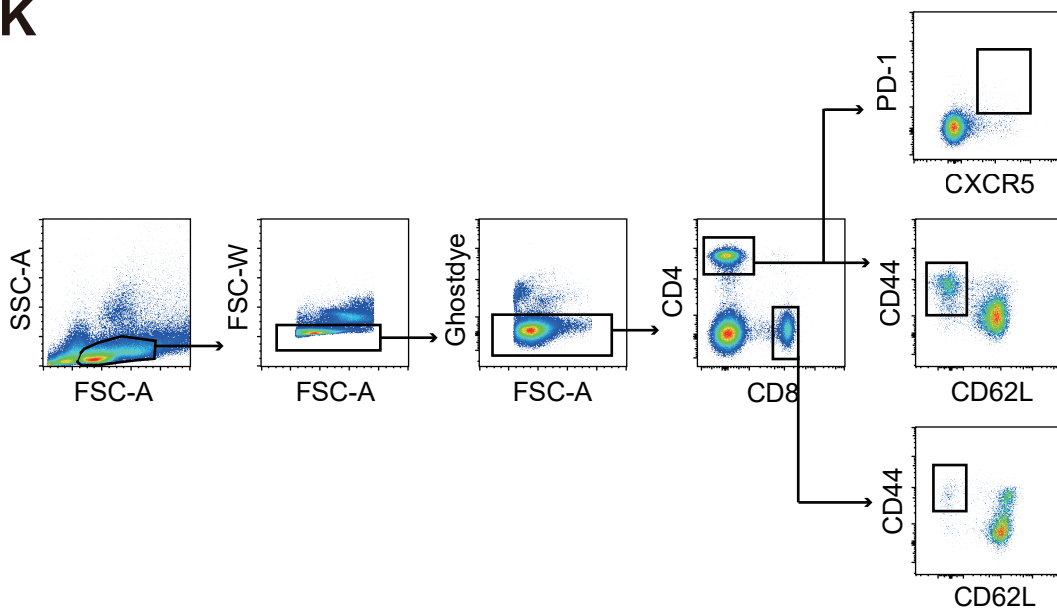

Figure 1-figure supplement 2A  
Figure 7-figure supplement 1C, D

**L**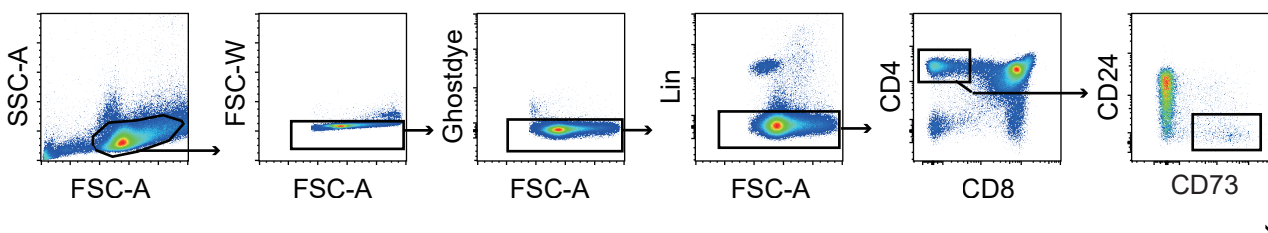

Figure 1-figure supplement 3A, B

**M**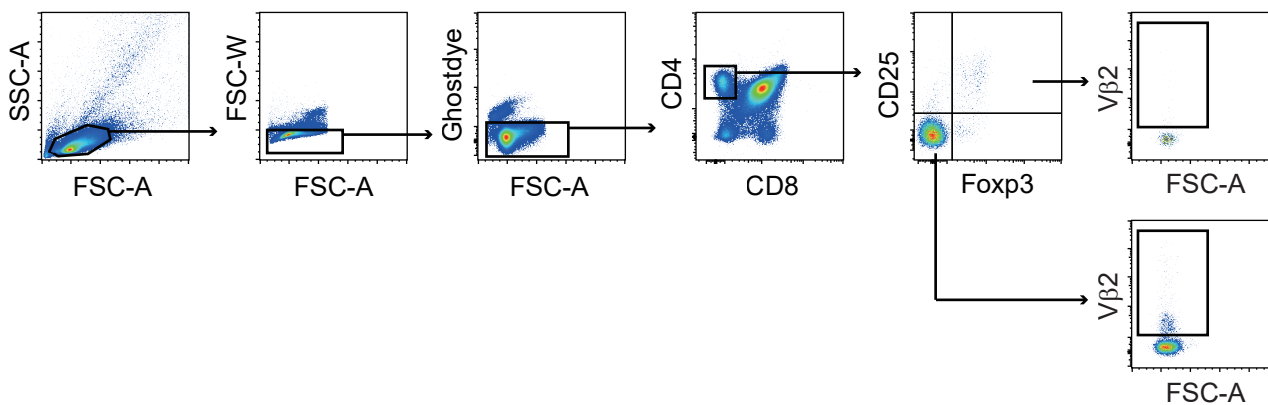

Figure 4-figure supplement 2A, B

#### Supplementary file 4. Flow cytometry gating strategy.

(A) Sequential gating strategy for CD44- and CD25-expressing double-negative (DN) cells from *Cic<sup>FLAG/FLAG</sup>* mice.

(B) Sequential gating strategy used for CD24<sup>hi</sup>TCRβ<sup>lo</sup> immature single-positive (ISP) cells and T cells expressing CD69 and TCRβ.

(C) Sequential gating strategy for DP, CD4 SP, CD8 SP, and DN cells expressing CD44 and CD25.

(D) Sequential gating strategy for T cells from TCR transgenic mice.

(E) Sequential gating strategy for Nur77 expression analysis in double-positive (DP) cells.

(F) Sequential gating strategy for CD5 expression analysis in DP, CD4 SP, and CD8 SP (TCRβ<sup>hi</sup>) cells.

(G) Sequential gating strategy for CD69<sup>+</sup> and CD69<sup>-</sup> DP cells.

(H) Sequential gating strategy for analysis of T cells from mixed bone marrow (BM) chimeric mice.

(I) Sequential gating strategy for GFP<sup>+</sup> DP cells.

(J) Sequential gating strategy for γδT cells expressing CD24, CD44, T-bet, and RORγt.

(K) Sequential gating strategy for splenic T cells expressing CD44 and CD62L.

(L) Sequential gating strategy for CD73<sup>+</sup>CD24<sup>lo</sup>CD4<sup>+</sup> T cells.

(M) Sequential gating strategy for CD4<sup>+</sup> non-Treg and Treg Vβ2 chain. Other Vβ chains were gated with the same gating strategy.
